# Supplementary material
Source: publisher figshare collection journal article supplement (https://aacr.figshare.com/articles/dataset/_/22367636)

# Supplemental Figure S1

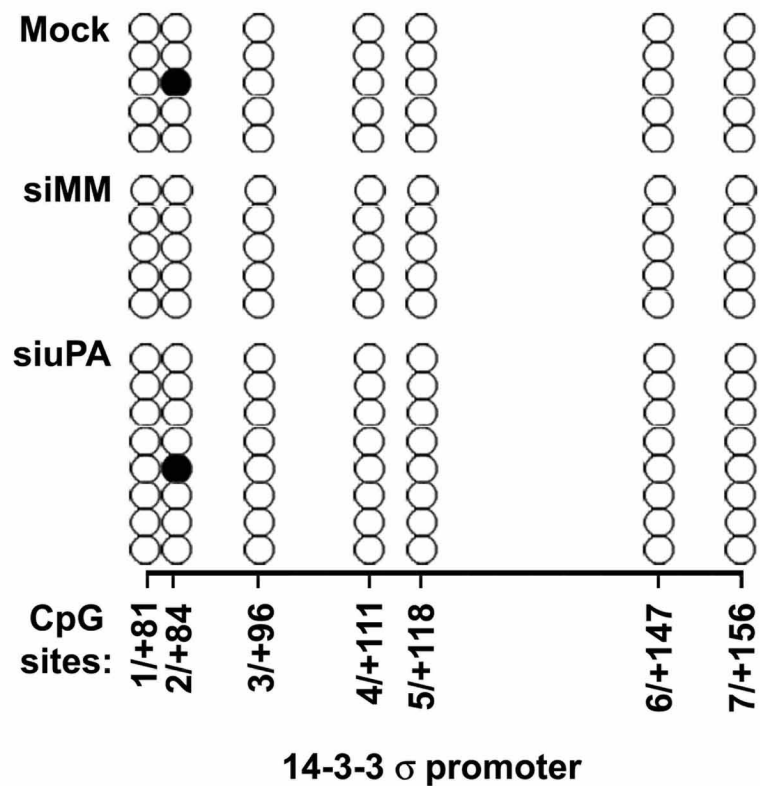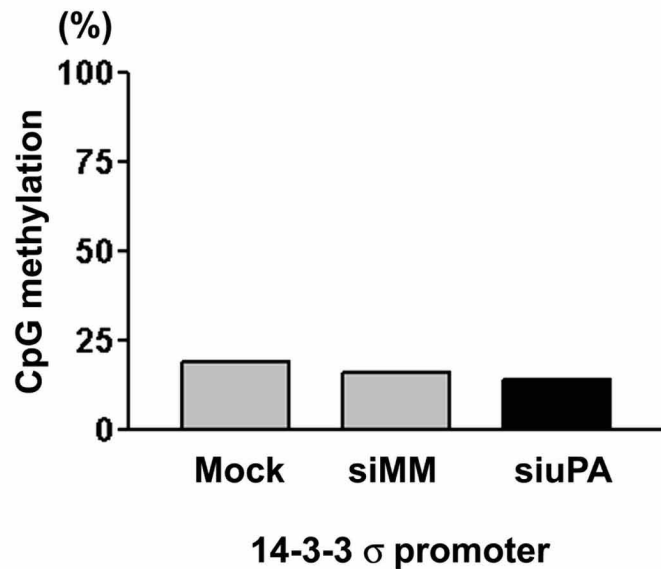

Supplement: Supplementary file 1 [file 39812708]
